# Supplementary material for: Chemical composition and bioactivity of hemp, reed canary grass and common reed grown on boreal marginal lands
Source: Royal Society of Chemistry journal article supplement (doi:10.1039/d3su00255a), 2023-01-01
Supplement: d3su00255a1.pdf [file d3su00255a1.pdf]

## Electronic Supplementary Information

# Chemical composition and bioactivity of hemp, reed canary grass and common reed grown on boreal marginal land †

Marina Fidelis,<sup>a,f</sup> Jenni Tienaho,<sup>a</sup> Hanna Brännström,<sup>b</sup> Risto Korpinen,<sup>b</sup> Juha-Matti Pihlava,<sup>b</sup> Jarkko Hellström,<sup>a</sup> Paula Jylhä,<sup>c</sup> Jaana Liimatainen,<sup>b</sup> Veikko Möttönen,<sup>d</sup> Jyri Maunuksela,<sup>e</sup> Petri Kilpeläinen<sup>b</sup>

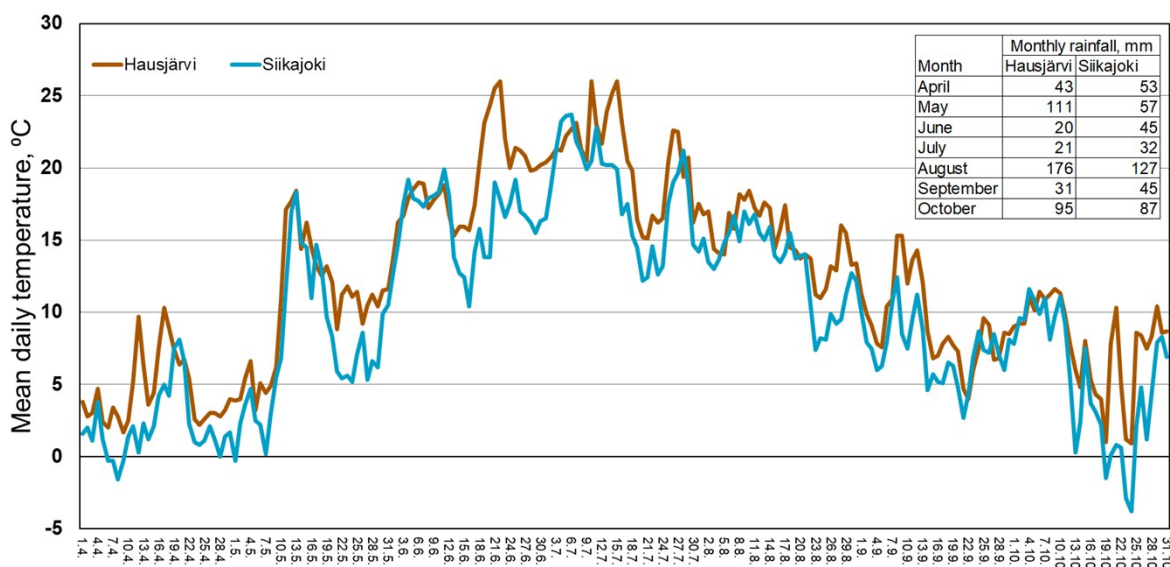

**Fig. S1** Mean daily temperatures and monthly rainfalls at the nearby weather stations of the Finnish Meteorological Institute (Hyvinkää and Siikajoki) 1.4.2021–31.10.2021. Source: Ilmatieteen Laitos (available at <https://www.ilmatieteenlaitos.fi/havaintojen-lataus>)

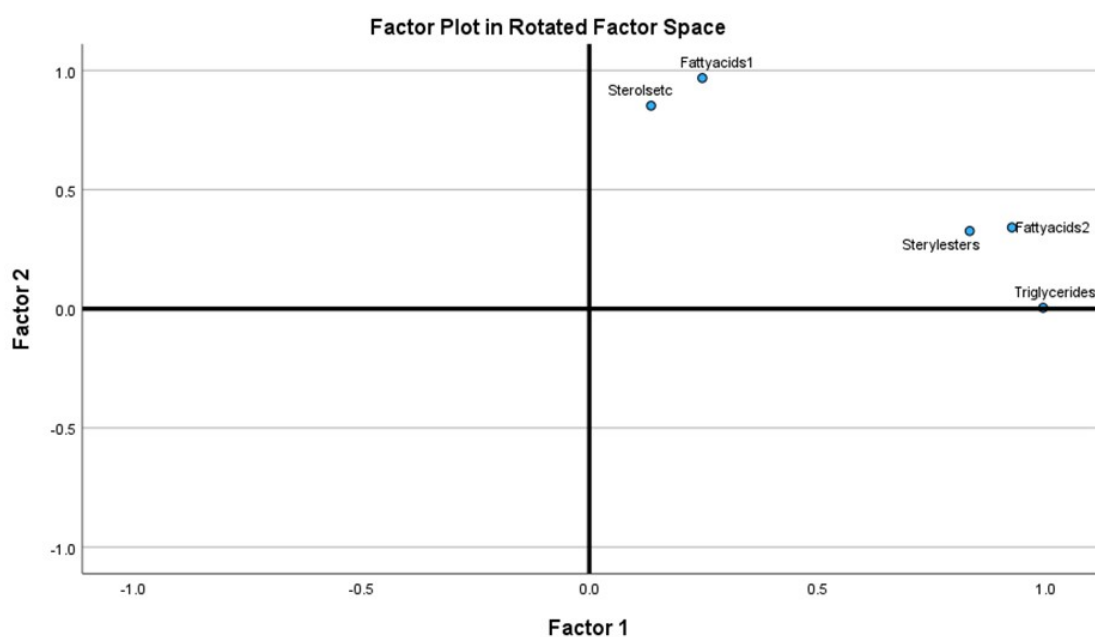

**Fig. S2** Multivariate factor analysis. Factor analysis showing high factor loadings between triglycerides, fatty acids 2 and sterylesters (Factor 1), and fatty acids 1 and sterols etc.

**Table S1** Rotated Factor Matrix

| Rotated Factor Matrix <sup>a</sup> |        |      |
|------------------------------------|--------|------|
| Compound group                     | Factor |      |
|                                    | 1      | 2    |
| Triglycerides                      | .995   |      |
| Fatty acids 2                      | .926   |      |
| Sterylesters                       | .834   |      |
| Fatty acids 1                      |        | .968 |
| Sterols etc.                       |        | .852 |

Note: Extraction Method: Maximum Likelihood. Rotation Method: Varimax with Kaiser Normalization. <sup>a</sup> Rotation converged in 3 iterations.

**Table S2** Correlations of TDS, carbohydrates and protein content of PHW extracts with biological and antibacterial activity.

| Determinator        | Sampling | TPC            | DPPH           | CUPRAC         | Fe (II) chelating ability | ORAC           | <i>E. coli</i> | <i>S. aureus</i> |
|---------------------|----------|----------------|----------------|----------------|---------------------------|----------------|----------------|------------------|
| TDS                 | Summer   | 0.292          | -0.263         | 0.105          | -0.011                    | 0.334          | 0.193          | 0.293            |
|                     | Autumn   | -0.020         | -0.153         | 0.141          | <b>0.568**</b>            | -0.522*        | 0.249          | -0.130           |
| Man                 | Summer   | 0.287          | -0.232         | 0.048          | -0.029                    | 0.454          | 0.163          | 0.233            |
|                     | Autumn   | 0.330          | 0.382          | 0.054          | -0.127                    | 0.003          | -0.342         | 0.458*           |
| Glc                 | Summer   | -0.136         | -0.564*        | -0.222         | 0.182                     | 0.318          | -0.034         | -0.065           |
|                     | Autumn   | 0.231          | 0.515*         | 0.306          | 0.153                     | -0.205         | -0.363         | 0.404            |
| Gal                 | Summer   | 0.068          | -0.326         | 0.018          | 0.270                     | 0.401          | 0.176          | 0.107            |
|                     | Autumn   | 0.128          | -0.018         | 0.145          | 0.240                     | <b>-0.534*</b> | 0.207          | 0.112            |
| Xyl                 | Summer   | <b>0.889**</b> | <b>0.662**</b> | <b>0.846**</b> | <b>-0.529*</b>            | 0.271          | <b>0.794**</b> | <b>0.908**</b>   |
|                     | Autumn   | 0.331          | 0.276          | 0.432          | -0.271                    | -0.256         | 0.352          | 0.133            |
| Ara                 | Summer   | <b>0.658**</b> | 0.061          | <b>0.620**</b> | -0.131                    | 0.499          | <b>0.726**</b> | <b>0.756**</b>   |
|                     | Autumn   | -0.065         | 0.054          | 0.185          | -0.042                    | -0.266         | 0.184          | 0.037            |
| Rha                 | Summer   | -0.016         | -0.372         | -0.042         | 0.401                     | 0.542*         | 0.098          | -0.007           |
|                     | Autumn   | 0.281          | 0.112          | -0.096         | 0.124                     | -0.077         | -0.235         | 0.242            |
| GlcA                | Summer   | 0.067          | -0.189         | 0.066          | 0.251                     | 0.205          | 0.153          | 0.133            |
|                     | Autumn   | -0.146         | 0.107          | 0.071          | 0.128                     | -0.401         | -0.019         | 0.131            |
| GalA                | Summer   | -0.228         | -0.359         | -0.132         | <b>0.671**</b>            | 0.360          | -0.049         | -0.208           |
|                     | Autumn   | 0.241          | 0.114          | -0.109         | 0.302                     | -0.164         | -0.299         | 0.229            |
| 4-O-Me-GlcA         | Summer   | <b>0.871**</b> | 0.316          | <b>0.807**</b> | -0.374                    | 0.627*         | <b>0.872**</b> | <b>0.922**</b>   |
|                     | Autumn   | <b>0.583**</b> | 0.159          | 0.214          | -0.087                    | -0.342         | 0.374          | 0.191            |
| Total carbohydrates | Summer   | 0.551*         | -0.055         | 0.452          | -0.094                    | 0.493          | 0.581*         | <b>0.608**</b>   |
|                     | Autumn   | 0.316          | 0.320          | 0.377          | -0.129                    | -0.309         | 0.163          | 0.224            |
| Protein content     | Summer   | 0.087          | -0.168         | 0.278          | <b>0.558**</b>            | <b>0.731**</b> | 0.460*         | 0.093            |
|                     | Autumn   | -0.191         | -0.239         | -0.236         | 0.213                     | 0.324          | 0.250          | <b>-0.584**</b>  |

Note: Bold values represent statistically significant results. \*\* Correlation is significant at the 0.01 level (2-tailed). \* Correlation is significant at the 0.05 level (2-tailed).
